# Supplementary material for: A nitrogen-doped NiCo2S4/CoO hollow multi-layered heterostructure microsphere for efficient oxygen evolution in Zn–air batteries
Source: Royal Society of Chemistry journal article supplement (doi:10.1039/d0nr07120j), 2020-12-10
Supplement: d0nr07120j1.pdf [file d0nr07120j1.pdf]

## *Supporting Information*

### **Nitrogen-Doped NiCo<sub>2</sub>S<sub>4</sub>/CoO hollow multi-layered heterostructure microsphere for efficient oxygen evolution in the Zn-air battery**

*Bin He<sup>ab</sup>, Juan-Juan Song<sup>a</sup>, Xiao-Yu Li<sup>b</sup>, Chun-Yu Xu<sup>b</sup>, Yi-Bo Li<sup>b</sup>, Ya-Wen Tang<sup>b</sup>, Qing-Li Hao<sup>a\*</sup>,  
Hong-Ke Liu<sup>b\*</sup> and Zhi Su<sup>b\*</sup>*

<sup>a</sup> Key Laboratory for Soft Chemistry and Functional Materials, Nanjing University of Science and Technology, Ministry of Education, Nanjing 210094, China.

E-mail: [qinglihao@njust.edu.cn](mailto:qinglihao@njust.edu.cn)

<sup>b</sup> Key Laboratory of Biofunctional Materials, College of Chemistry and Materials Science, Nanjing Normal University, Nanjing 210046, China.

F-mail: [zhisu@nynu.edu.cn](mailto:zhisu@nynu.edu.cn), [liuhongke@nynu.edu.cn](mailto:liuhongke@nynu.edu.cn)

**Table S1.** OER performances of **N-NiCo<sub>2</sub>S<sub>4</sub>/CoO** microsphere in comparison of recently representative electrocatalysts in alkaline medium (1.0 M KOH, at 10 mA cm<sup>-2</sup>).

| <b>catalyst</b>                                                                     | <b>Overpotential (mV)</b> | <b>Reference</b> |
|-------------------------------------------------------------------------------------|---------------------------|------------------|
| <b>N-NiCo<sub>2</sub>S<sub>4</sub>/CoO</b>                                          | <b>238</b>                | <b>This work</b> |
| NiFe/NiCo <sub>2</sub> O <sub>4</sub> /NF                                           | 340                       | 1                |
| amorphous CoP/NF                                                                    | 284                       | 2                |
| Ni-Co-P HNBS                                                                        | 270                       | 3                |
| NiCoP@NF                                                                            | 280                       | 4                |
| NiCo <sub>2</sub> S <sub>4</sub> nanoflake/NF                                       | 319                       | 5                |
| Ni <sub>3</sub> S <sub>2</sub> @MoS <sub>2</sub> /FeOOH                             | 260                       | 6                |
| Mo-Co(OH) <sub>2</sub> HNTs                                                         | 218                       | 7                |
| Ni <sub>3</sub> (BO <sub>3</sub> ) <sub>2</sub> -Ni <sub>3</sub> S <sub>2</sub> /NF | 217                       | 8                |
| Ni/Ni(OH) <sub>2</sub> nanosheets                                                   | 270                       | 9                |
| FeNiB/FeNi foam-700                                                                 | 272                       | 10               |
| Pt@Co <sub>3</sub> O <sub>4</sub> /NF                                               | 260                       | 11               |
| Co <sub>4</sub> N-CeO <sub>2</sub>                                                  | 239                       | 12               |

**Table S2.** The main differences of N-NiCo<sub>2</sub>S<sub>4</sub>/CoO microsphere in comparison of Ni-Co-S multi-shell hollow microspheres.

|                           | NiCoS                       | N-NiCo <sub>2</sub> S <sub>4</sub> /CoO                                         |
|---------------------------|-----------------------------|---------------------------------------------------------------------------------|
| catalyst composition      | NiS <sub>2</sub> /NiO       | N-NiCo <sub>2</sub> S <sub>4</sub> /CoO                                         |
| synthesis method          | sulfur powder vulcanization | sulfur powder vulcanization in the presence of NH <sub>4</sub> HCO <sub>3</sub> |
| working electrode         | glassy carbon electrode     | nickel foam electrode                                                           |
| electrocatalytic property | HER                         | OER                                                                             |

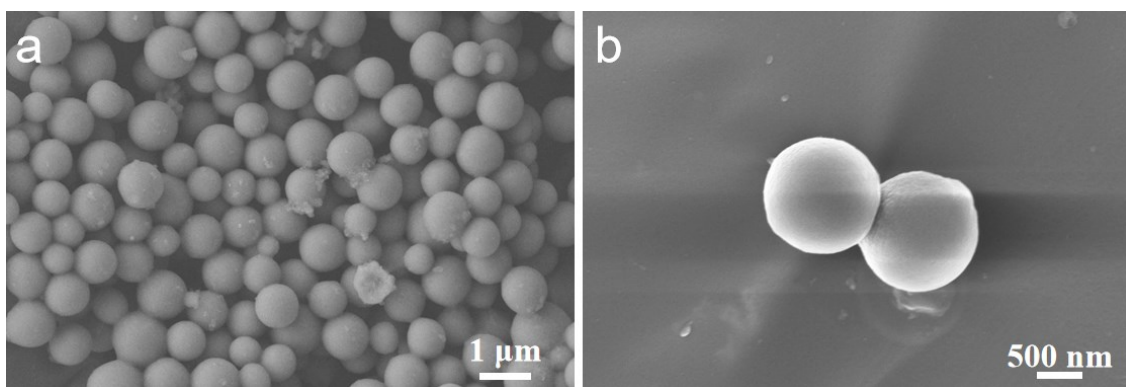

**Fig. S1.** SEM images of NiCo-BTC MOF microsphere.

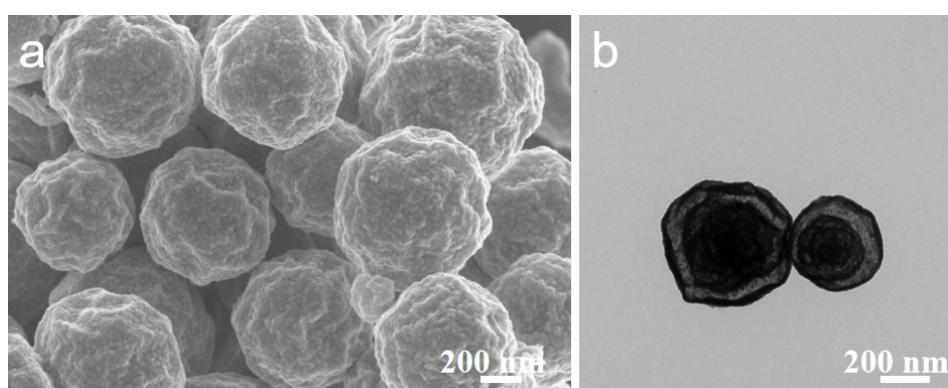

**Fig. S2.** (a) SEM and (b) TEM images of the NiCo<sub>2</sub>O<sub>4</sub> microsphere.

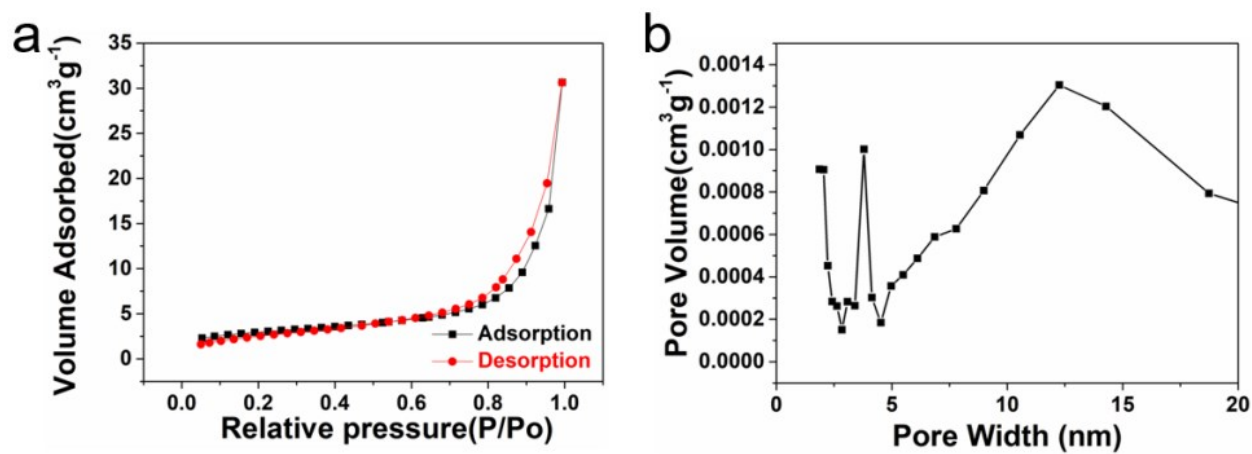

**Fig. S3.** Nitrogen adsorption-desorption isotherms and Pore size distributions of N-NiCo<sub>2</sub>S<sub>4</sub>/CoO.

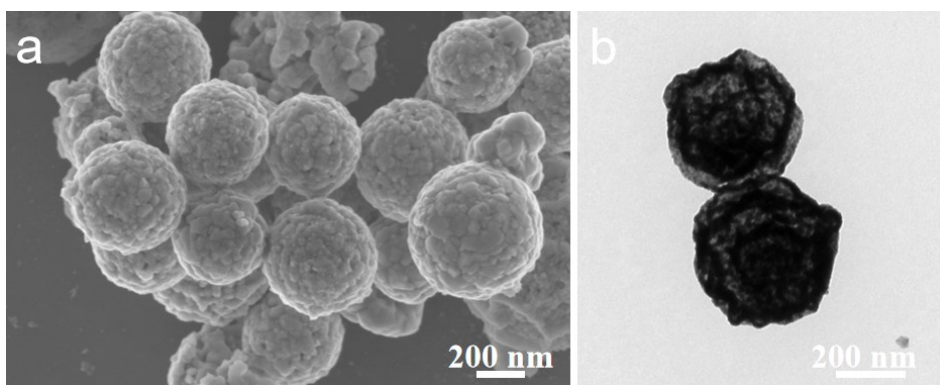

Fig. S4. SEM (a) and TEM image (b) of the  $\text{NiCo}_2\text{S}_4/\text{CoO}$  microsphere.

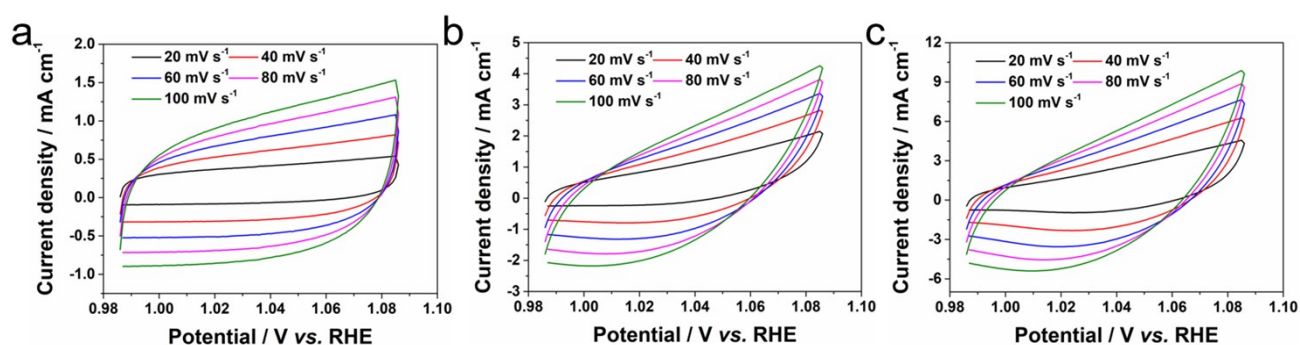

Fig. S5. Cyclic voltammogram (CV) curves of (a)  $\text{NiCo}_2\text{O}_4$ , (b)  $\text{NiCo}_2\text{S}_4/\text{CoO}$  and (c)  $\text{N-NiCo}_2\text{S}_4/\text{CoO}$  samples.

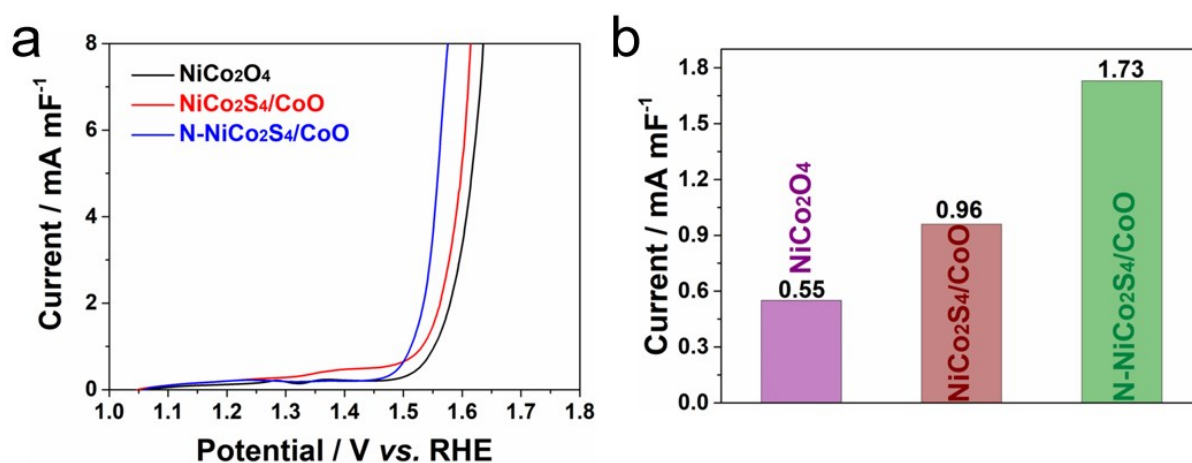

Fig. S6. (a) LSV curves normalized by ECSA and (b) The normalized current density by ECSA at 300 mV overpotential of  $\text{NiCo}_2\text{O}_4$ ,  $\text{NiCo}_2\text{S}_4/\text{CoO}$  and  $\text{N-NiCo}_2\text{S}_4/\text{CoO}$ .

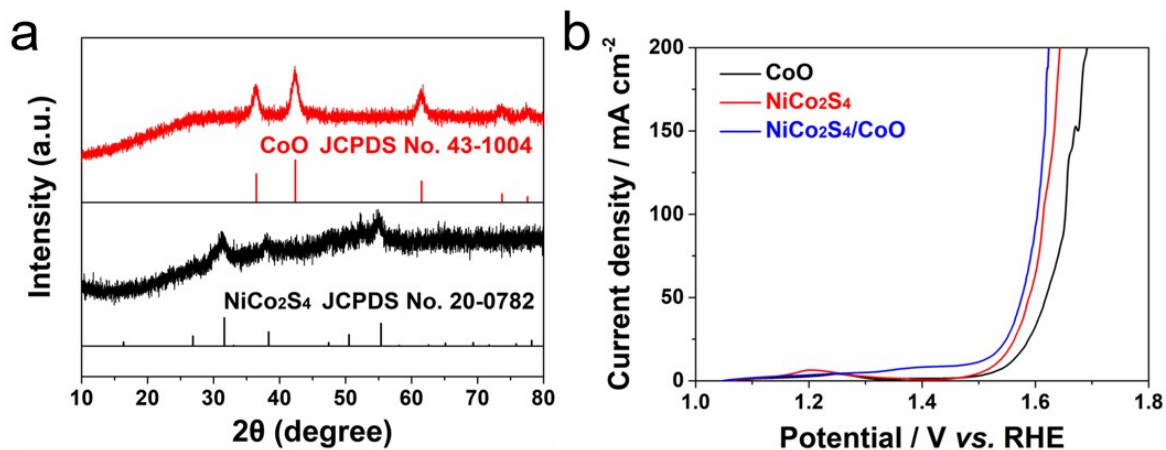

**Fig. S7.** (a) XRD patterns of  $\text{NiCo}_2\text{S}_4$  and  $\text{CoO}$ , (b) LSV polarization curves of  $\text{NiCo}_2\text{S}_4$ ,  $\text{CoO}$  and  $\text{NiCo}_2\text{S}_4/\text{CoO}$ .

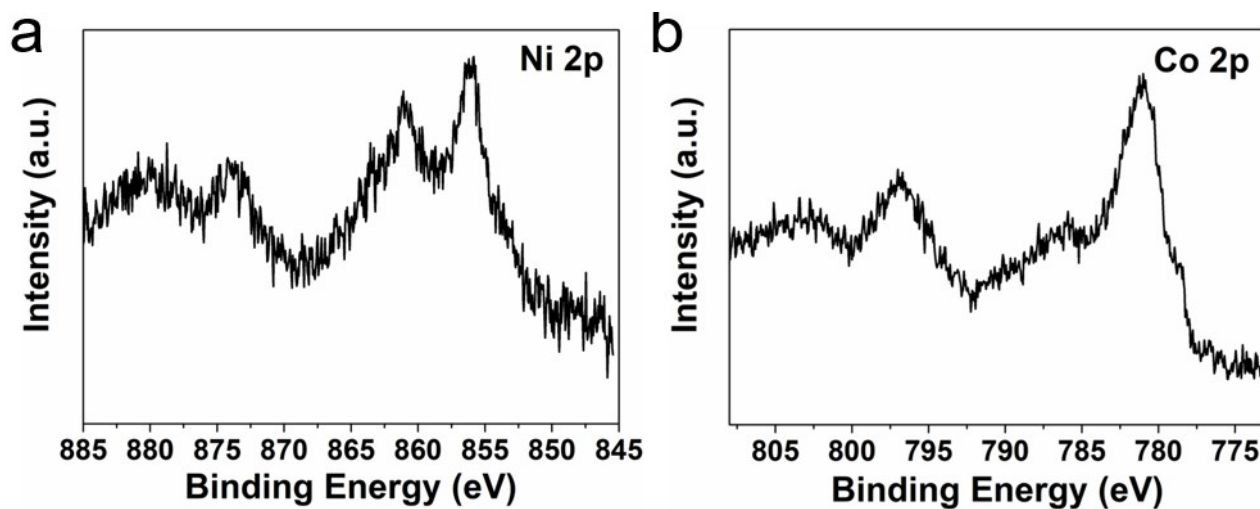

**Fig. S8.** High-resolution XPS spectra at Ni 2p (a) and Co 2p (b) for N- $\text{NiCo}_2\text{S}_4/\text{CoO}$  microsphere after OER test.

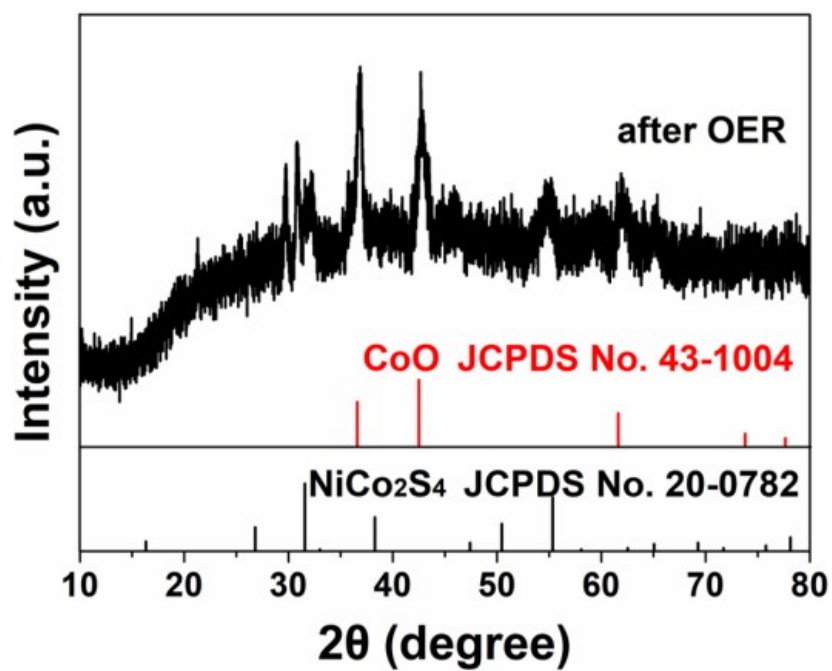

**Fig. S9.** XRD pattern of N-NiCo<sub>2</sub>S<sub>4</sub>/CoO microsphere after OER test.

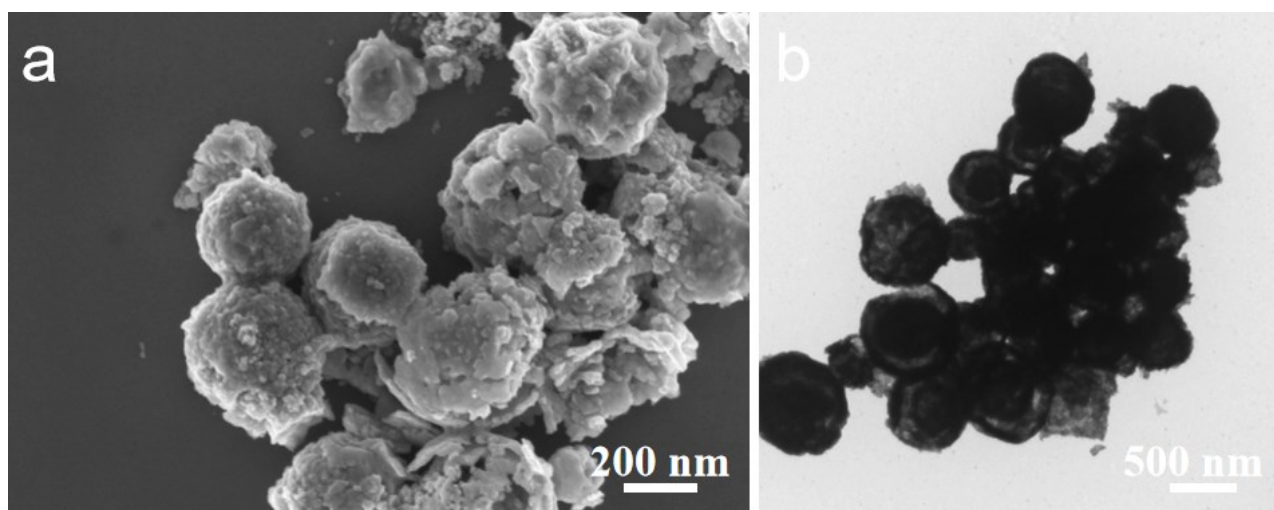

**Fig. S10.** SEM (a) and TEM images (b) for N-NiCo<sub>2</sub>S<sub>4</sub>/CoO microsphere after OER test.

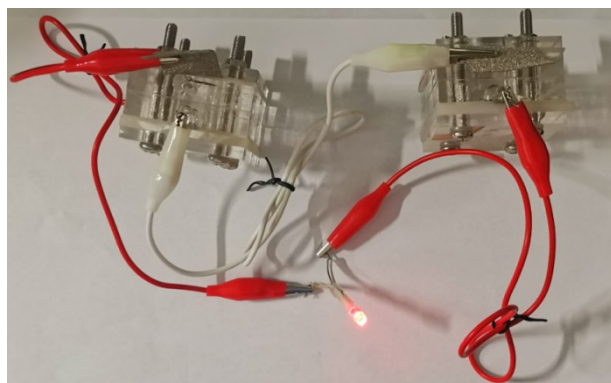

**Fig. S11.** A LED lamp ( $\sim 3.0$  V) could be powered up by two Zn-air batteries in series with the N- $\text{NiCo}_2\text{S}_4/\text{CoO}$  + Pt/C catalyst as air-cathode.



## References

1. C. L. Xiao, Y. Li, X. Lu and C. Zhao, *Adv. Funct. Mater.*, 2016, **26**, 3515-3523.
2. R. BeltráelSuito, P. W. Menezes and M. Driess, *J. Mater. Chem. A.*, 2019, **7**, 15749-15756.
3. E. L. Hu, Y. F. Feng, J. Nai, D. Zhao, Y. Hu and X. W. Lou, *Energy Environ. Sci.*, 2018, **11**, 872-880.
4. H. F. Liang, A. N. Gandi, D. H. Anjum, X. Wang, U. Schwingenschlogl and H. N. Alshareef, *Nano Lett.*, 2016, **16**, 7718-7725.
5. J. Yu, C. Lv, L. Zhao, L. Zhang, Z. Wang and Q. Liu, *Adv. Mater. Interfaces.* 2018, **5**, 1701396.
6. M. Zheng, K. Guo, W. J. Jiang, T. Tang, X. Wang, P. Zhou, J. Du, Y. Zhao, C. Xu and J. S. Hu, *Appl. Catal. B: Environ.*, 2019, **244**, 1004-1012.
7. C. Y. Xu, W. Lu, L. Yan, J. Q. Ning, C. Zheng, Y. J. Zhong, Z. Zhang and Y. Hu, *J Colloid Interface Sci.*, 2020, **562**, 400-408.
8. Z. Sun, X. Wang, M. Yuan, H. Yang, Y. Su, K. Shi, C. Nan, H. Li, G. Sun, J. Zhu, X. Yang and S. Chen, *ACS Appl. Mater. Interfaces.*, 2020, **12**, 23896-23903.
9. L. Dai, Z. N. Chen, L. Li, P. Yin, Z. Liu and H. Zhang, *Adv Mater.*, 2020, **32**, 1906915.
10. H. F. Yuan, S. M. Wang, X. D. Gu, B. Tang, J. P. Li and X. G. Wang, *J. Mater. Chem. A*, 2019, **7**, 19554-19564.
11. L. Huang, M. Wei, S. Zaman, A. Ali and B. Y. Xia, *Chem. Eng. J.*, 2020, **398**, 125669.
12. H. Sun, C. Tian, G. Fan, J. Qi, Z. Liu, Z. Yan, F. Cheng, J. Chen, C. P. Li and M. Du, *Adv. Funct. Mater.*, 2020, 1910596.
